# Supplementary material for: Resveratrol Alleviates the Early Challenges of Implant-Based Drug Delivery in a Human Glial Cell Model
Source: MDPI journal article supplement (doi:10.3390/ijms25042078), 2024-02-08

# Resveratrol Alleviates the Early Challenges of Implant-Based Drug Delivery in a Human Glial Cell Model

Luise Schlotterose, François Cossais, Ralph Lucius and Kirsten Hattermann \*

Institute of Anatomy, Kiel University, 24118 Kiel, Germany

**Table S1:** PEG400 does not have a significant effect on HMC3 and SVGA. HMC3:

| Mean +/-<br>SD                                   | Control                                                  | + PEG                                                            | p <<br>0.05?                | OGD                                                            | OGD +<br>PEG                                                   | p < 0.05?                   |
|--------------------------------------------------|----------------------------------------------------------|------------------------------------------------------------------|-----------------------------|----------------------------------------------------------------|----------------------------------------------------------------|-----------------------------|
| ROS<br>FACS<br>(MFI)                             | 1843 +/-<br>161.9                                        | 1502                                                             | ns                          | 6719 +/-<br>1284                                               | 5648 +/-<br>537.6                                              | ns                          |
| Cytokines<br>qPCR<br>( $\Delta\Delta\text{ct}$ ) | IL1 $\beta$ : 1<br>IL6: 1                                | IL1 $\beta$ :<br>1,232 +/-<br>0.8887<br>IL6: 1.213<br>+/- 0.6929 | IL1 $\beta$ : ns<br>IL6: ns | IL1 $\beta$ :<br>3,240 +/-<br>1.159<br>IL6: 2.099<br>+/- 1.007 | IL1 $\beta$ :<br>2,738 +/-<br>1.760<br>IL6: 2.105<br>+/- 1.591 | IL1 $\beta$ : ns<br>IL6: ns |
| Cytokines<br>ELISA<br>(pg/mg)                    | IL1 $\beta$ :<br>9,551 +/-<br>3.258<br>IL6:<br>68.01 +/- | IL1 $\beta$ :<br>9,095 +/-<br>1.336<br>IL6: 68.51<br>+/- 10.72   | IL1 $\beta$ : ns<br>IL6: ns | IL1 $\beta$ :<br>85,49 +/-<br>5.778<br>IL6: 330.4<br>+/- 38.84 | IL1 $\beta$ :<br>71,23 +/-<br>20.32<br>IL6: 340.3<br>+/- 21.05 | IL1 $\beta$ : ns<br>IL6: ns |

|                                   |                    |                    |    |                    |                    |    |
|-----------------------------------|--------------------|--------------------|----|--------------------|--------------------|----|
|                                   | 4.028              |                    |    |                    |                    |    |
| Caspases3<br>/7 activity<br>(RLU) | 26703<br>+/- 5847  | 26896 +/-<br>5642  | ns | 27693 +/-<br>4394  | 24060 +/-<br>4483  | ns |
| Proliferatio<br>n (n-fold)        | 14,44 +/-<br>4,457 | 11,75 +/-<br>3,566 | ns | 6,303 +/-<br>1,516 | 5,475 +/-<br>2,422 | ns |
| HIF-1α<br>ELISA<br>(pg/mg)        | 537,9 +/-<br>94,95 | 560,5 +/-<br>72,98 | ns | 453,1 +/-<br>160,2 | 333,3 +/-<br>109,9 | ns |

SVGA:

| Mean +/-<br>SD               | Control           | + PEG                | p <<br>0.05? | OGD                 | OGD +<br>PEG        | p < 0.05? |
|------------------------------|-------------------|----------------------|--------------|---------------------|---------------------|-----------|
| ROS<br>FACS<br>(MFI)         | 2329 +/-<br>232.2 | 2011                 | ns           | 8066 +/-<br>1071    | 8343 +/-<br>2587    | ns        |
| Galectin-3<br>qPCR<br>(ΔΔct) | 1,000             | 0,9872 +/-<br>0.3951 | ns           | 1,727 +/-<br>0.4713 | 1,853 +/-<br>0.4840 | ns        |
| Galectin-3<br>ICC (FI/       | 163004<br>+/-     | 181920 +/-<br>36675  | ns           | 303700<br>+/- 51657 | 231984<br>+/- 75044 | ns        |

|                                   |                         |                      |    |                         |                         |    |
|-----------------------------------|-------------------------|----------------------|----|-------------------------|-------------------------|----|
| count)                            | 42915                   |                      |    |                         |                         |    |
| Caspases3<br>/7 activity<br>(RLU) | 15401<br>+/- 2217       | 13403 +/-<br>1841    | ns | 33587 +/-<br>10591      | 30019 +/-<br>4497       | ns |
| Proliferatio<br>n (n-fold)        | 8,559 +/-<br>0,9907     | 11,59 +/-<br>3,497   | ns | 6,503 +/-<br>1,055      | 7,722 +/-<br>2,316      | ns |
| HIF-1α<br>ELISA<br>(pg/mg)        | 406,6 +/-<br>31.07      | 383,6 +/-<br>155     | ns | 1095 +/-<br>207.5       | 734,9 +/-<br>155.6      | ns |
| HIF-1α<br>ICC (FI/<br>count)      | 237881<br>+/-<br>119885 | 166139 +/-<br>144429 | ns | 637951<br>+/-<br>189280 | 656002<br>+/-<br>211290 | ns |

**Figure S1:** Secondary antibody controls for immunocytochemistry shown in Figures 3 and 5. The primary antibodies were omitted during the staining procedure.

Representative images from n = 3 independent cell cultures (scale bar: 50  $\mu$ m)

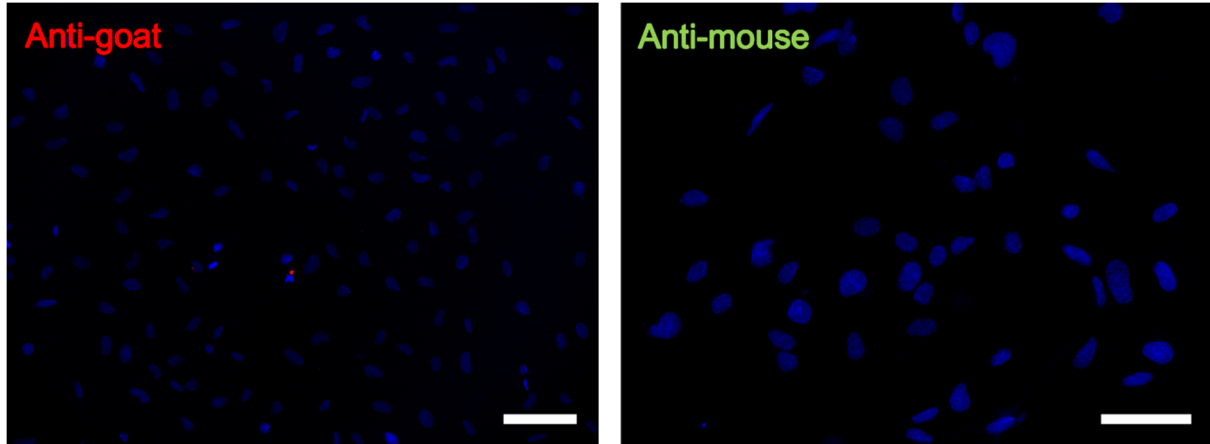

Supplement: s1 [file s1]
