# Supplementary material for: Resveratrol Alleviates the Early Challenges of Implant-Based Drug Delivery in a Human Glial Cell Model
Source: MDPI journal article supplement (doi:10.3390/ijms25042078), 2024-02-08

**Figure S1:** Secondary antibody controls for immunocytochemistry shown in Figures 3 and 5. The primary antibodies were omitted during the staining procedure. Representative images from n = 3 independent cell cultures (scale bar: 50  $\mu$ m)

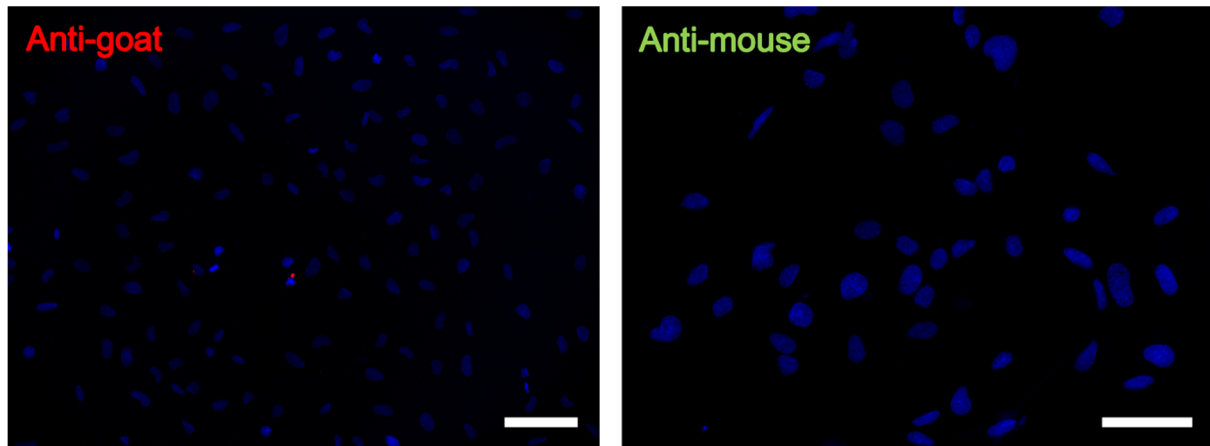

Supplement: s1 [file s1]
