# Supplementary material for: Resveratrol Alleviates the Early Challenges of Implant-Based Drug Delivery in a Human Glial Cell Model
Source: MDPI journal article supplement (doi:10.3390/ijms25042078), 2024-02-08
Supplement: s1 [file s1]

**TableS1:** PEG400 does not have a significant effect on HMC3 and SVGA.

HMC3:

| Mean +/-<br>SD                                   | Control                                                           | + PEG                                                         | p < 0.05?                   | OGD                                                            | OGD +<br>PEG                                                | p < 0.05?                   |
|--------------------------------------------------|-------------------------------------------------------------------|---------------------------------------------------------------|-----------------------------|----------------------------------------------------------------|-------------------------------------------------------------|-----------------------------|
| ROS FACS<br>(MFI)                                | 1843 +/-<br>161.9                                                 | 1502                                                          | ns                          | 6719 +/-<br>1284                                               | 5648 +/-<br>537.6                                           | ns                          |
| Cytokines<br>qPCR<br>( $\Delta\Delta\text{ct}$ ) | IL1 $\beta$ : 1<br>IL6: 1                                         | IL1 $\beta$ : 1,232<br>+/- 0.8887<br>IL6: 1.213<br>+/- 0.6929 | IL1 $\beta$ : ns<br>IL6: ns | IL1 $\beta$ :<br>3,240 +/-<br>1.159<br>IL6: 2.099<br>+/- 1.007 | IL1 $\beta$ : 2,738<br>+/- 1.760<br>IL6: 2.105<br>+/- 1.591 | IL1 $\beta$ : ns<br>IL6: ns |
| Cytokines<br>ELISA<br>(pg/mg)                    | IL1 $\beta$ :<br>9,551 +/-<br>3.258<br>IL6:<br>68.01 +/-<br>4.028 | IL1 $\beta$ : 9,095<br>+/- 1.336<br>IL6: 68.51<br>+/- 10.72   | IL1 $\beta$ : ns<br>IL6: ns | IL1 $\beta$ :<br>85,49 +/-<br>5.778<br>IL6: 330.4<br>+/- 38.84 | IL1 $\beta$ : 71,23<br>+/- 20.32<br>IL6: 340.3<br>+/- 21.05 | IL1 $\beta$ : ns<br>IL6: ns |
| Caspases3/<br>7 activity<br>(RLU)                | 26703 +/-<br>5847                                                 | 26896 +/-<br>5642                                             | ns                          | 27693 +/-<br>4394                                              | 24060 +/-<br>4483                                           | ns                          |
| Proliferation<br>(n-fold)                        | 14,44 +/-<br>4,457                                                | 11,75 +/-<br>3,566                                            | ns                          | 6,303 +/-<br>1,516                                             | 5,475 +/-<br>2,422                                          | ns                          |

|                |           |           |    |           |           |    |
|----------------|-----------|-----------|----|-----------|-----------|----|
| HIF-1 $\alpha$ | 537,9 +/- | 560,5 +/- | ns | 453,1 +/- | 333,3 +/- | ns |
| ELISA          | 94,95     | 72,98     |    | 160,2     | 109,9     |    |
| (pg/mg)        |           |           |    |           |           |    |

SVGA:

| Mean +/-<br>SD                                    | Control             | + PEG                | p < 0.05? | OGD                 | OGD +<br>PEG        | p < 0.05? |
|---------------------------------------------------|---------------------|----------------------|-----------|---------------------|---------------------|-----------|
| ROS FACS<br>(MFI)                                 | 2329 +/-<br>232.2   | 2011                 | ns        | 8066 +/-<br>1071    | 8343 +/-<br>2587    | ns        |
| Galectin-3<br>qPCR<br>( $\Delta\Delta\text{ct}$ ) | 1,000               | 0,9872 +/-<br>0.3951 | ns        | 1,727 +/-<br>0.4713 | 1,853 +/-<br>0.4840 | ns        |
| Galectin-3<br>ICC (FI/<br>count)                  | 163004<br>+/- 42915 | 181920 +/-<br>36675  | ns        | 303700 +/-<br>51657 | 231984 +/-<br>75044 | ns        |
| Caspases3/<br>7 activity<br>(RLU)                 | 15401 +/-<br>2217   | 13403 +/-<br>1841    | ns        | 33587 +/-<br>10591  | 30019 +/-<br>4497   | ns        |
| Proliferation<br>(n-fold)                         | 8,559 +/-<br>0,9907 | 11,59 +/-<br>3,497   | ns        | 6,503 +/-<br>1,055  | 7,722 +/-<br>2,316  | ns        |
| HIF-1 $\alpha$<br>ELISA<br>(pg/mg)                | 406,6 +/-<br>31.07  | 383,6 +/-<br>155     | ns        | 1095 +/-<br>207.5   | 734,9 +/-<br>155.6  | ns        |

|                              |                         |                      |    |                      |                      |    |
|------------------------------|-------------------------|----------------------|----|----------------------|----------------------|----|
| HIF-1α ICC<br>(FI/<br>count) | 237881<br>+/-<br>119885 | 166139 +/-<br>144429 | ns | 637951 +/-<br>189280 | 656002 +/-<br>211290 | ns |
|------------------------------|-------------------------|----------------------|----|----------------------|----------------------|----|
